# Supplementary material
Source: PubMed Central journal article supplement (PMC6869493)
Supplement: HBM-35-4706-s001.pdf [file HBM-35-4706-s001.pdf]

**Additional tables online**

**Additional table I: Coordinate of the regions of interest in three resting state networks: the default mode network, the right and left fronto-parietal attention networks and the dorsal attentional network.**

| Label AAL                     | Talairach coordinate (x,y,z) |     |     |
|-------------------------------|------------------------------|-----|-----|
| Default mode network          |                              |     |     |
| Temporal_Mid                  | 61                           | -8  | -17 |
| Precuneus                     | -1                           | -54 | 30  |
| Frontal_Mid_Orb               | 0                            | 50  | -8  |
| Frontal_Sup_Medial            | 2                            | 54  | 23  |
| Frontal_Mid                   | 25                           | 32  | 48  |
| Frontal_Sup                   | -21                          | 31  | 45  |
| ParaHippocampal               | -22                          | -19 | -16 |
| ParaHippocampal               | 23                           | -18 | -16 |
| Precuneus                     | 0                            | -57 | 59  |
| Cingulum_Mid                  | 0                            | -22 | 37  |
| Temporal_Mid                  | -61                          | -15 | -13 |
| Angular                       | -44                          | -67 | 34  |
| Temporal_Mid                  | 50                           | -61 | 33  |
| Precentral                    | 36                           | -20 | 64  |
| Right fronto-parietal network |                              |     |     |
| Angular                       | 47                           | -55 | 44  |
| Temporal_Mid                  | 62                           | -30 | -11 |
| Tempotal_Mid                  | 53                           | -53 | 21  |

|                    |    |    |    |
|--------------------|----|----|----|
| Frontal_Mid_Orb    | 36 | 54 | -2 |
| Frontal_Mid        | 45 | 22 | 38 |
| Frontal_Sup_Medial | 5  | 31 | 39 |
| Frontal_Mid        | 28 | 10 | 61 |
| Insula             | 39 | 19 | -9 |

## Left fronto-parietal network

|                    |     |     |     |
|--------------------|-----|-----|-----|
| Frontal_Inf_Tri    | -44 | 43  | 6   |
| Frontal_Inf_Oper   | -46 | 13  | 28  |
| Frontal_Mid        | -29 | 10  | 58  |
| Frontal_Inf_Orb    | -20 | 27  | -16 |
| Frontal_Sup        | -18 | 61  | 9   |
| Temporal_Inf       | -57 | -50 | -7  |
| Angular            | -36 | -55 | 47  |
| Occipital_Mid      | -29 | -71 | 38  |
| Temporal_Mid       | -44 | -66 | 26  |
| Frontal_Sup_Medial | -2  | 25  | 44  |

## Dorsal attentional network

|                 |     |     |     |
|-----------------|-----|-----|-----|
| Cerebellum_6    | 22  | -69 | -16 |
| Temporal_Inf    | -48 | -64 | -2  |
| Temporal_Inf    | 52  | -58 | -4  |
| Precentral      | -50 | 7   | 26  |
| Parietal_Inf    | 43  | -35 | 49  |
| SupraMarginal   | 61  | -21 | 36  |
| Occipital_Mid   | 30  | -64 | 34  |
| Frontal_Inf_Tri | 48  | 40  | 9   |

|                 |     |     |     |
|-----------------|-----|-----|-----|
| Fronal_Inf_Tri  | -43 | 36  | 16  |
| SupraMarginal   | -41 | -37 | 48  |
| Parietal_Sup    | -21 | -59 | 59  |
| Occipital_Mid   | -26 | -68 | 29  |
| Cingulum_Mid    | 1   | 4   | 31  |
| Precentral      | -27 | -5  | 57  |
| Precentral      | 31  | -4  | 58  |
| Cerebelum_Crus1 | -25 | -71 | -16 |

---

For Peer Review

**Additional table II: Coordinates of the regions of interest within the default-mode network used for regional functional analysis and regional DTI analysis.**

| Label AAL                                  | Talairach coordinate (x,y,z) |     |     |
|--------------------------------------------|------------------------------|-----|-----|
| Medial Prefrontal Cortex (MPFC)            | 2                            | 54  | 23  |
| Posterior Cingulate Cortex/Precuneus (PCC) | -1                           | -54 | 30  |
| Left Parahippocampal Gyrus                 | -22                          | -19 | -16 |
| Right Parahippocampal Gyrus                | 23                           | -18 | -16 |

For Peer Review

**Additional table III: VBM analysis: Anatomical regions showing more grey matter atrophy in CI MS patients compared to CP MS patients**

| Anatomical region                     | Hemi-<br>sphere | BA | Talairach coordinate<br>(x,y,z) |     |     | Cluster size<br>(mm <sup>3</sup> ) | T-score |
|---------------------------------------|-----------------|----|---------------------------------|-----|-----|------------------------------------|---------|
| <u>Cortical structures</u>            |                 |    |                                 |     |     |                                    |         |
| Middle Frontal Gyrus                  | L               | 8  | -44                             | 17  | 46  | 236                                | 5.61    |
| Inferior Frontal Gyrus                | L               | 44 | -54                             | 6   | 12  | 861                                | 4.82    |
|                                       | L               | 11 | -34                             | 34  | -14 | 216                                | 4.75    |
| Superior Frontal Gyrus                | L               | 9  | -15                             | 51  | 32  | 283                                | 4.24    |
| Supramarginal Gyrus                   | R               | 40 | 37                              | -45 | 38  | 334                                | 4.20    |
| Posterior cingulate gyrus /<br>Cuneus | L               | 31 | -3                              | -68 | 20  | 3169                               | 5.52    |
| Parahippocampal Gyrus                 | R               | 27 | 21                              | -31 | -2  | 321                                | 5.24    |
| Inferior Temporal Gyrus               | L               | 20 | -63                             | -26 | -14 | 266                                | 4.36    |
| Middle Temporal Gyrus                 | L               | 21 | -64                             | -37 | -8  | 304                                | 4.30    |
| <u>Subcortical structures</u>         |                 |    |                                 |     |     |                                    |         |
| Caudate nucleus                       | L               | -  | -9                              | 13  | 5   | 1225                               | 4.52    |
|                                       | R               | -  | 9                               | 15  | 5   | 1444                               | 4.47    |
| Thalamus                              | R               | -  | 18                              | -23 | 12  | 2595                               | 4.99    |

*BA: Brodmann Area*

*Values are significant at  $p < 0.001$ , corrected for cluster extension.*
